# Supplementary material for: Unbalance of intestinal microbiota in atopic children
Source: PubMed Central journal article supplement (PMC3404014; doi:10.1186/1471-2180-12-95), 2012-06-06
Supplement: 1471-2180-12-95-S5.pdf [file 1471-2180-12-95-S5.pdf]

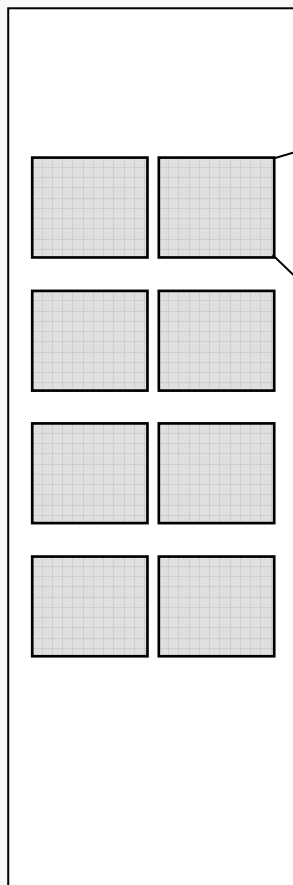

(a)

|           |           |              |           |            |            |            |            |            |            |            |            |           |              |           |           |
|-----------|-----------|--------------|-----------|------------|------------|------------|------------|------------|------------|------------|------------|-----------|--------------|-----------|-----------|
| <b>66</b> | <b>63</b> | <b>Blank</b> | <b>1</b>  | <b>2</b>   | <b>3</b>   | <b>4</b>   | <b>5</b>   | <b>1</b>   | <b>2</b>   | <b>3</b>   | <b>4</b>   | <b>5</b>  | <b>Blank</b> | <b>63</b> | <b>66</b> |
| 6         | 7         | 8            | 9         | 10         | 12         | 14         | 15         | 6          | 7          | 8          | 9          | 10        | 12           | 14        | 15        |
| 16        | 17        | 18           | 19        | 20         | 21         | 22         | 23         | 16         | 17         | 18         | 19         | 20        | 21           | 22        | 23        |
| 24        | 27        | 28           | 29        | 31         | 32         | 33         | 34         | 24         | 27         | 28         | 29         | 31        | 32           | 33        | 34        |
| 35        | 36        | 37           | 38        | 39         | 40         | 41         | 42         | 35         | 36         | 37         | 38         | 39        | 40           | 41        | 42        |
| 44        | 1B        | 3B           | 5B        | 11B        | 13B        | 15B        | 21B        | 44         | 1B         | 3B         | 5B         | 11B       | 13B          | 15B       | 21B       |
| <b>66</b> | <b>63</b> | <b>Blank</b> | <b>1</b>  | <b>2</b>   | <b>3</b>   | <b>23B</b> | <b>25B</b> | <b>23B</b> | <b>25B</b> | <b>1</b>   | <b>2</b>   | <b>3</b>  | <b>Blank</b> | <b>63</b> | <b>66</b> |
| 4         | 5         | 6            | 7         | 8          | 9          | 10         | 12         | 4          | 5          | 6          | 7          | 8         | 9            | 10        | 12        |
| 14        | 15        | 16           | 17        | 18         | 19         | 20         | 21         | 14         | 15         | 16         | 17         | 18        | 19           | 20        | 21        |
| 22        | 23        | 24           | 27        | 28         | 29         | 31         | 32         | 22         | 23         | 24         | 27         | 28        | 29           | 31        | 32        |
| 33        | 34        | 35           | 36        | 37         | 38         | 39         | 40         | 33         | 34         | 35         | 36         | 37        | 38           | 39        | 40        |
| 41        | 42        | 44           | 1B        | 3B         | 5B         | 11B        | 13B        | 41         | 42         | 44         | 1B         | 3B        | 5B           | 11B       | 13B       |
| <b>66</b> | <b>63</b> | <b>Blank</b> | <b>66</b> | <b>15B</b> | <b>21B</b> | <b>23B</b> | <b>25B</b> | <b>15B</b> | <b>21B</b> | <b>23B</b> | <b>25B</b> | <b>66</b> | <b>Blank</b> | <b>63</b> | <b>66</b> |

(b)

| ZipCode Number | Sequence 5' -> 3'          |
|----------------|----------------------------|
| 1              | GATGATCGACGAGACACTCTCGCCA  |
| 2              | CGGTGACGAGCTGCCGCGCAAGAT   |
| 3              | GACATTGCGATCGCCGCCGCTTT    |
| 4              | CGGTATCGCGACCGCATCCCAATCT  |
| 5              | GCTCGAAGAGGCGCTACAGATCCTC  |
| 6              | CACCGCCAGCTCGGCTTCGAGTTCG  |
| 7              | CGACTCCCTGTTTGTGATGGACCAC  |
| 8              | CTTTTCCCGTCCGTTCATCGCTCAAG |
| 9              | GGCTGGGTCTACAGATCCCAACTT   |
| 10             | GAACCTTTCGCTTACCGGCCGATC   |
| 12             | TTTCGGCACGCGCGGGATCACCATC  |
| 14             | CTCGGTGGTGCTGACGGTGAATCC   |
| 15             | TCAACGTGCCAGCGCGTCTGGGA    |
| 16             | GCGAAGGAACTCGACGTGGACGCCG  |
| 17             | CGGGGATACCGATCTCGGGCGCACA  |
| 18             | GGAGCTTACGCCATCACGATGCGAT  |
| 19             | CGTGGCGGTGCGGAGTTCCCGGAA   |
| 20             | CGATCCAACGCACTGGCCAAACCTA  |
| 21             | CTGAATCCTCCAACCGGGTTGTCTGA |
| 22             | TTCCGGCGCTGGCGTAAAGCTTTGG  |
| 23             | GTAAATCTCCAGCGGAAGGGTACGG  |
| 24             | CCGGCTTTGAACTGCTCACCGATCT  |
| 27             | ACTACGCAACACCGAACGGATACCC  |
| 28             | GGACCAATGGTCCCATTGACCAAGT  |
| 29             | CAACGCTGAGCGCTCACTGACATA   |
| 31             | GAGACAAAGGTCTGCGCCAGCACCA  |
| 32             | TGGCCACACTGTCCATTTGCGCGGT  |
| 33             | CCTTGCGACGTGTCAAGTTGGGGTC  |
| 34             | AGGTTAGGGTTCGCGCCAAACTCTCC |
| 35             | ACGACTGCGAGGTGCGGTAAGCACA  |
| 36             | GCGATCGCCGGGAGATATACCCAAC  |
| 37             | TCGTGCCGGAAGTTCGAGCACCATAC |
| 38             | GCTTTAGCACCGCGATGGCGTAGAC  |
| 39             | CAGCCGCGGTACTGAATGCGATGCT  |
| 40             | CCCCGGATAGCTGACGAGGCTTACG  |
| 41             | TCCGGACAGGTTGGGGTTCGTTTTGG |
| 42             | CGTAGAGCAACGCGATACCCCGAC   |
| 44             | AGCAGCAGTGACAATGCCACCGCGG  |
| 1B             | TGCGACCTCAGCATCGACCTCAGC   |
| 3B             | CAGCACCTGACCATCGATCGCAGC   |
| 5B             | GACCACCTTTCGATCGGGTACAGC   |
| 11B            | TGCGGGTACAGCACCTACCTTGCG   |
| 13B            | CAGCGGTAGACCACCTATCGTGCG   |
| 15B            | GACCGGTATGCGACCTGGTATGCG   |
| 21B            | TGCGATCGCAGCGGTAACCTGACC   |
| 23B            | CAGCATCGGACCGGTAATCGGACC   |
| 25B            | GACCATCGTGGGGTAGGTAGACC    |
| 63             | TGGCACCGACGGCTGGCACACCAC   |
| 66             | TACCGGCGGCAGCACCGGTAAC     |

(c)
