# Supplementary material for: Unbalance of intestinal microbiota in atopic children
Source: PubMed Central journal article supplement (PMC3404014; doi:10.1186/1471-2180-12-95), 2012-06-06
Supplement: 1471-2180-12-95-S6.pdf [file 1471-2180-12-95-S6.pdf]

### B.LONGUM

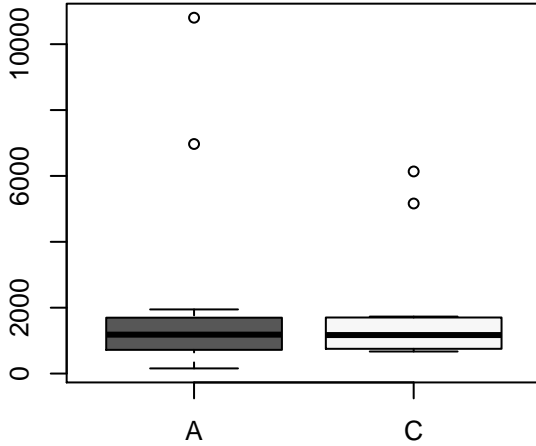

P value = 0.78

### Y. ENTEROCOLITICA

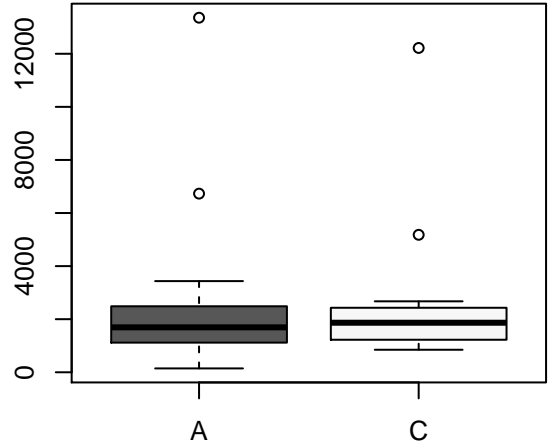

P value = 0.72

### PROTEUS

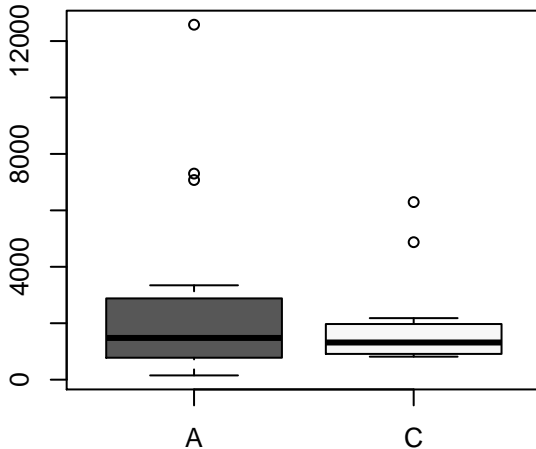

P value = 0.87

### CAMPYLOBACTER

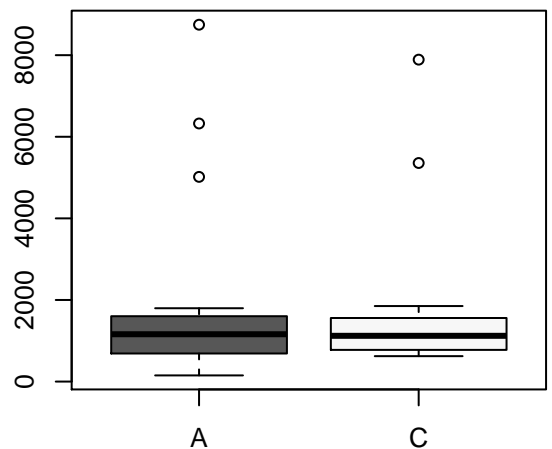

P value = 0.81

### B.CEREUS

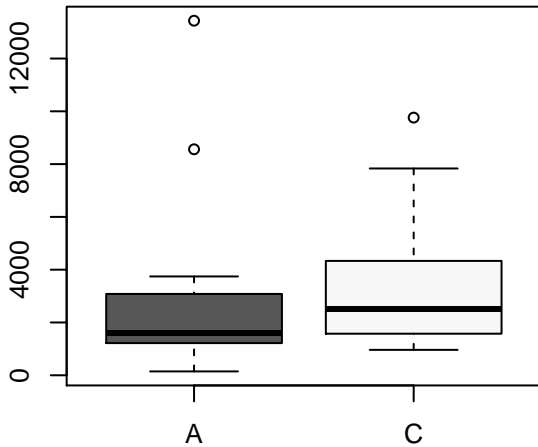

P value = 0.29

### B.SUBTILIS

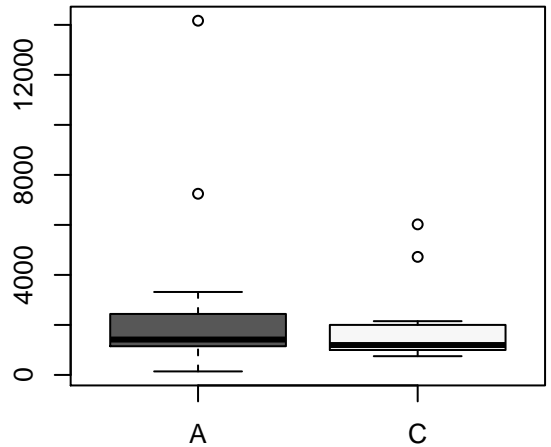

P value = 0.54

### E.FAECALIS

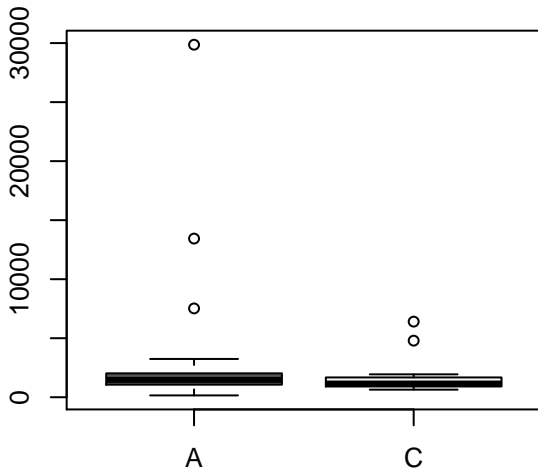

P value = 0.31

### E.FAECIUM

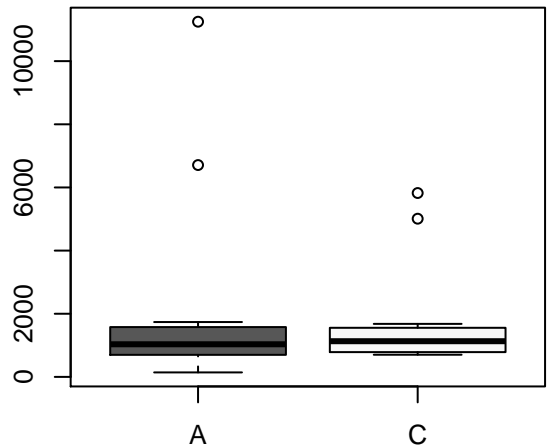

P value = 0.72

### L.CASEI

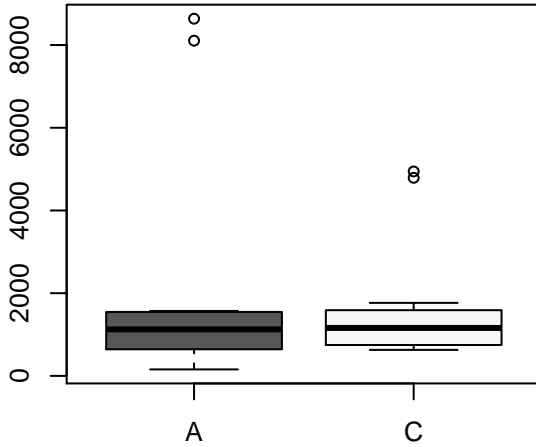

P value = 0.69

### L.SALIVARIUS

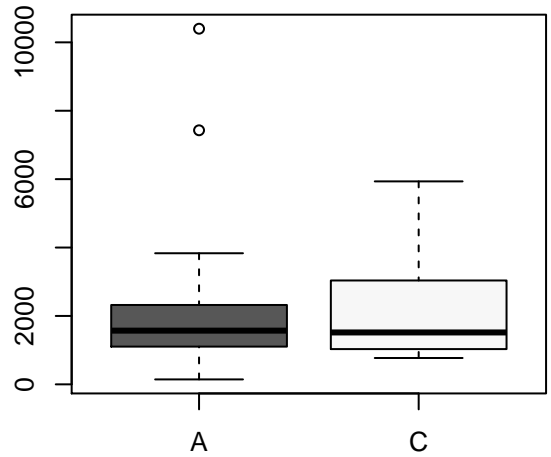

P value = 0.75

### FUSOBACTERIUM

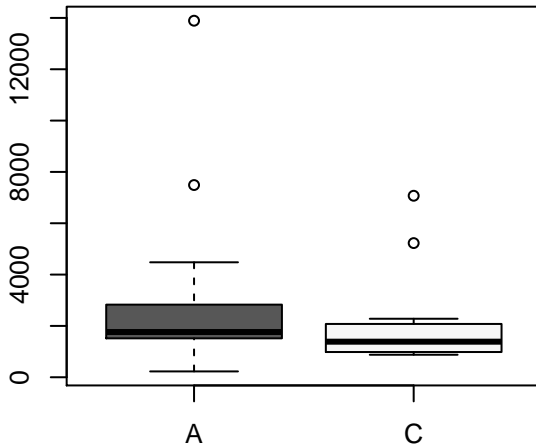

P value = 0.29

### BACT.PRE

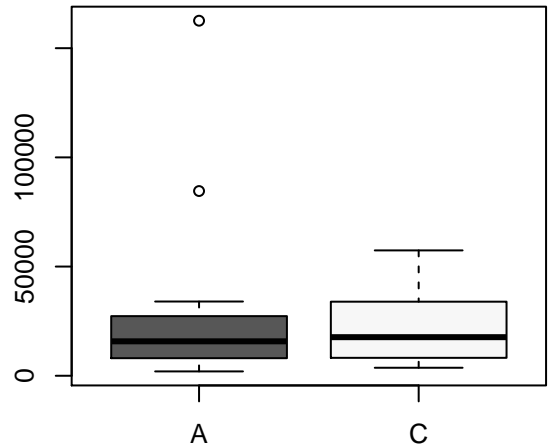

P value = 0.9

### C.PERFRINGENS

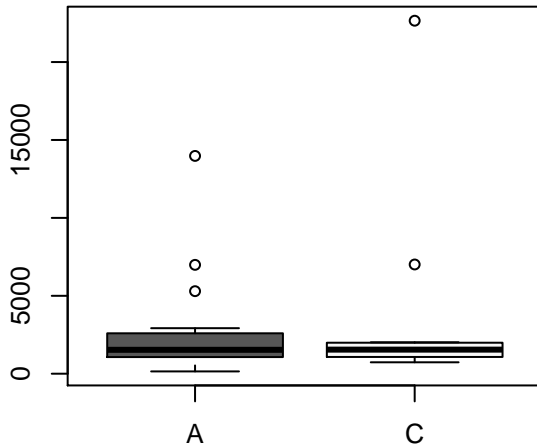

P value = 0.94

### C.DIFFICILE

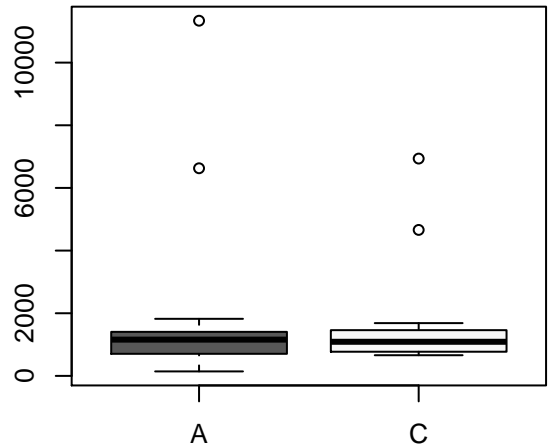

P value = 0.97

### E.RECTALE

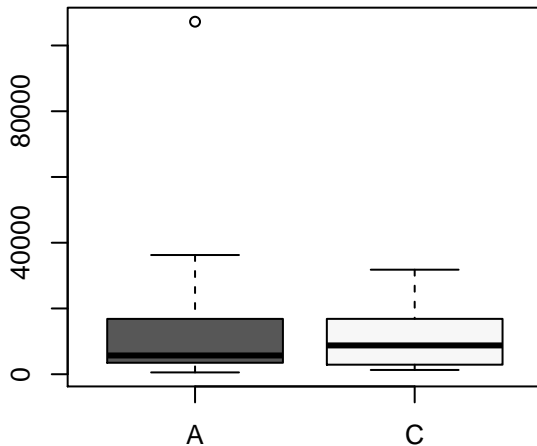

P value = 0.94

### VEILLONELLA

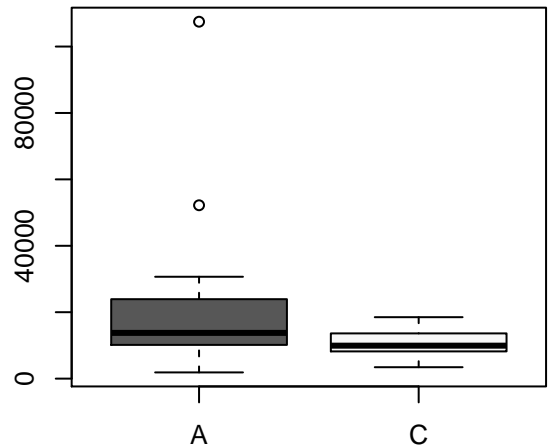

P value = 0.068

**Cl.XIV**

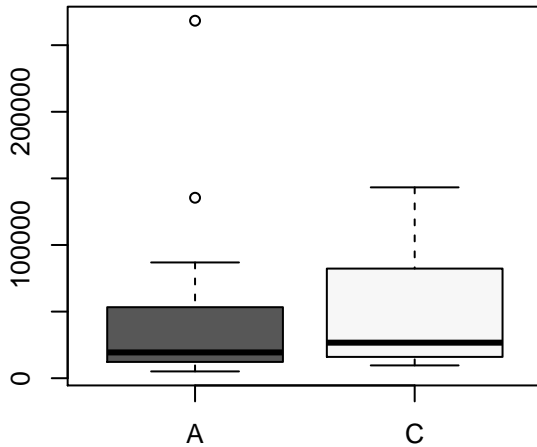

P value = 0.26

**B.CLAUSII**

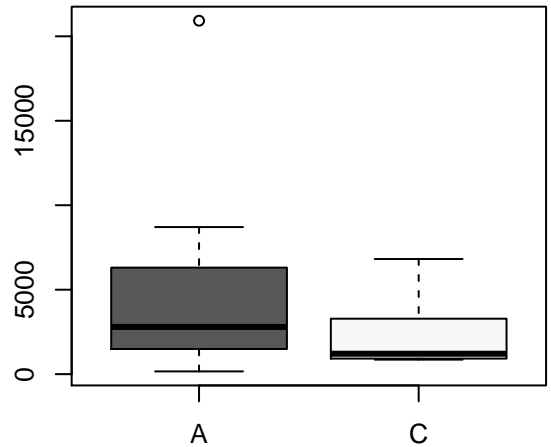

P value = 0.21

**L.PLANTARUM**

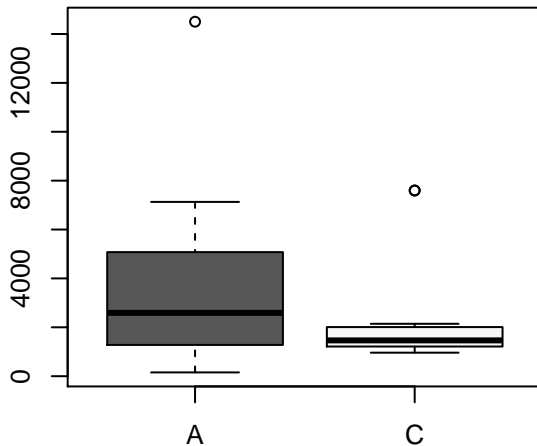

P value = 0.31

**Cl.I.II**

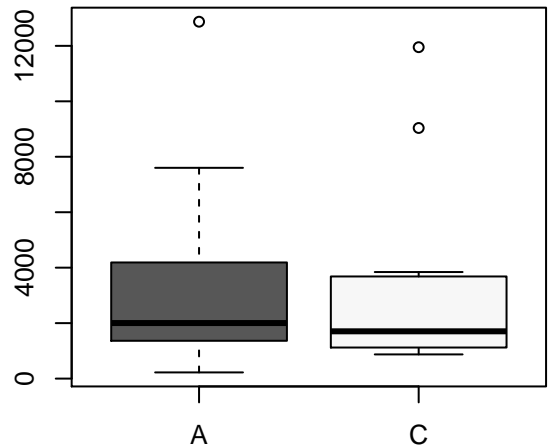

P value = 0.72

**Cl.XI**

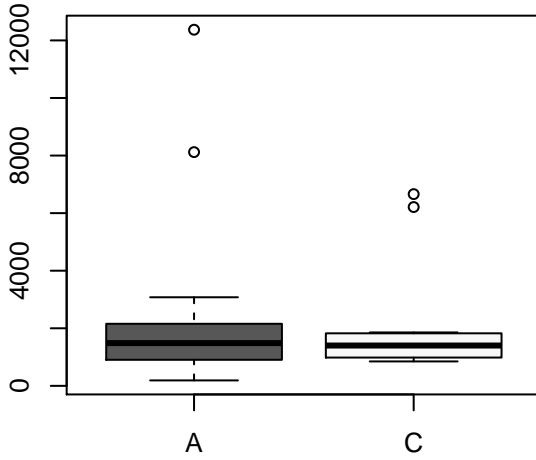

P value = 0.97

**Cl.IX**

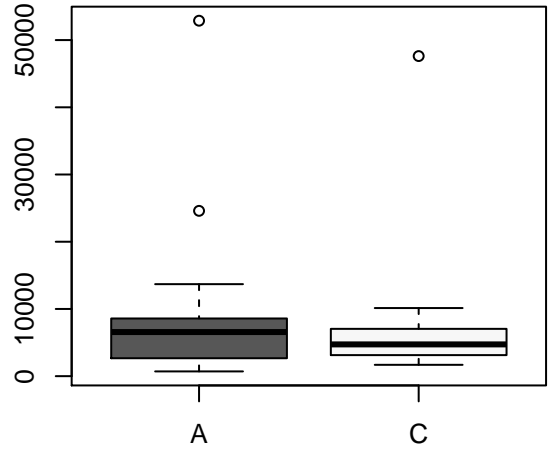

P value = 0.75

**Cl.IV\_R.BROMII**

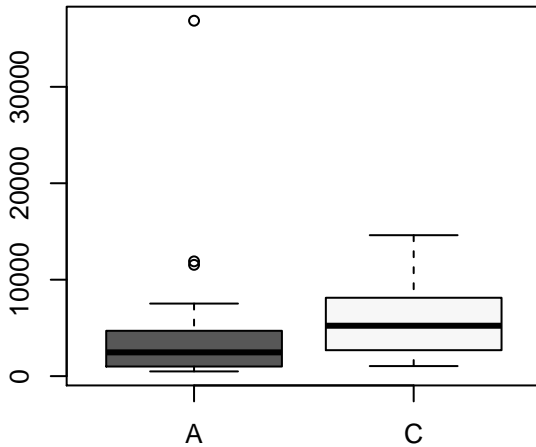

P value = 0.12

**Cl.IV\_R.ALBUS**

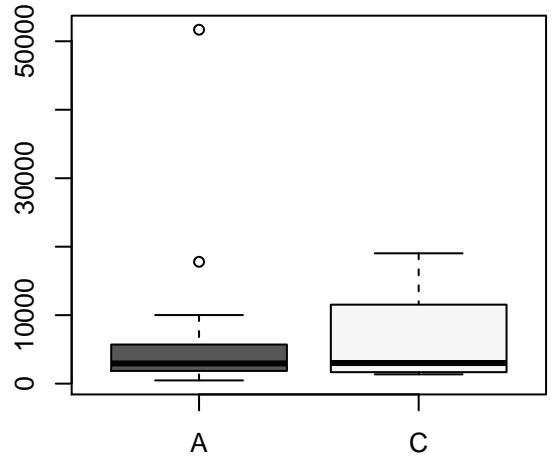

P value = 0.78

### CI.IV\_F.PRAUSNITZII

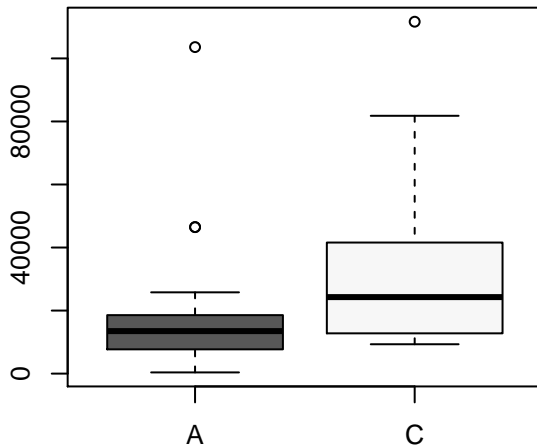

P value = 0.081

### CI.IV\_O.GUILLERMONDII

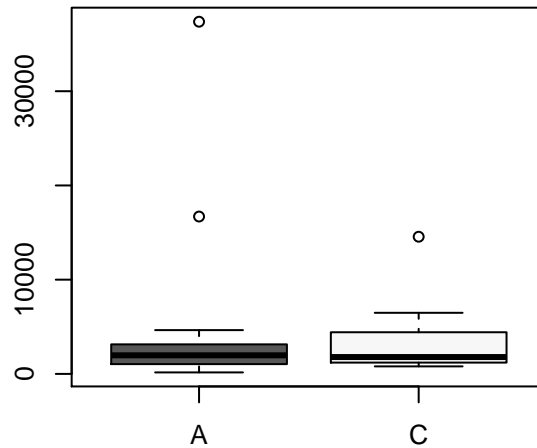

P value = 0.72

### CYANOBACTERIA

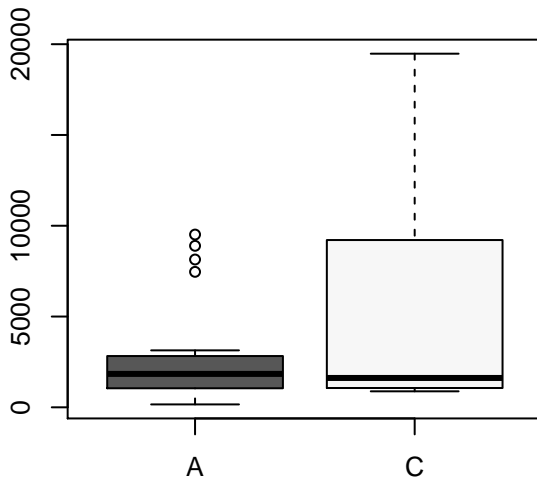

P value = 0.47

### AKKERMANSIA

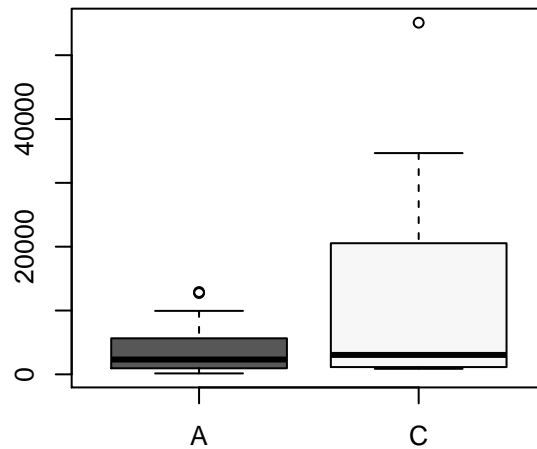

P value = 0.24

## LACTOBACILLACEAE

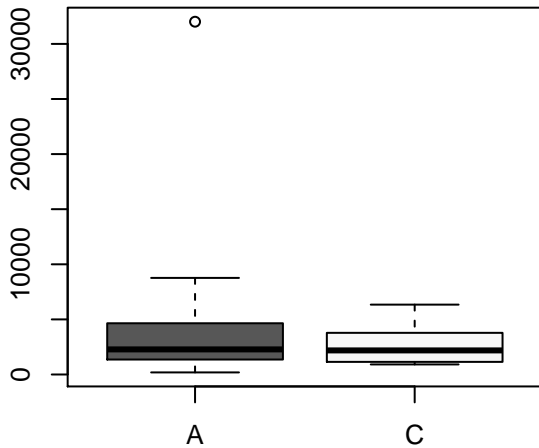

P value = 0.69

## ENTEROBACTERIACEAE

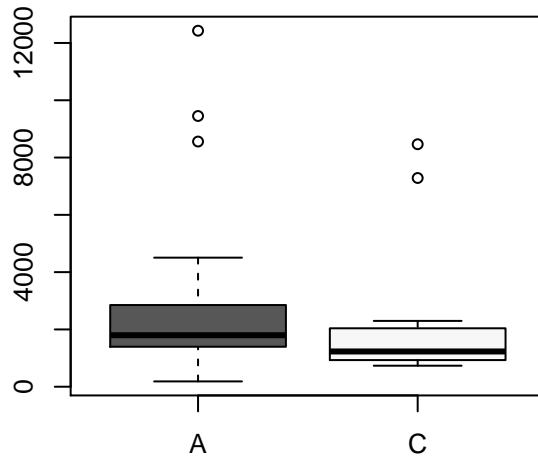

P value = 0.089

## BIFIDOBACTERIACEAE

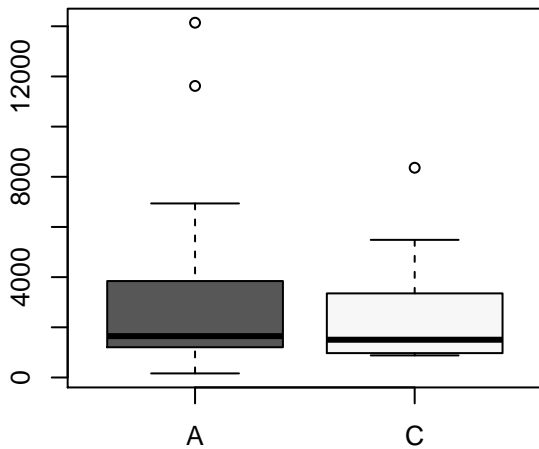

P value = 0.66
